# Supplementary material
Source: Springer Nature journal article supplement (https://www.springermedizin.de/resource/supplementary/12885_2008_1232_MOESM4_ESM.pdf/9471478)

A

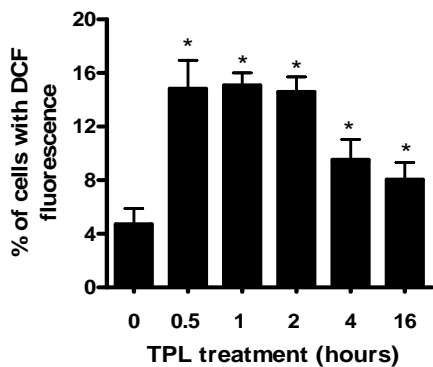

B

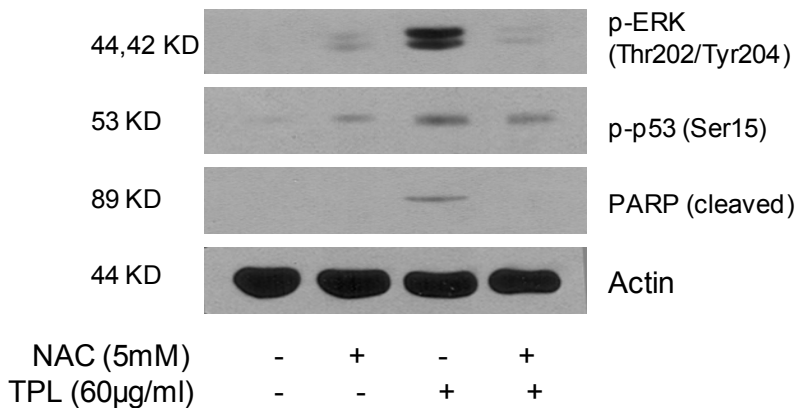

C

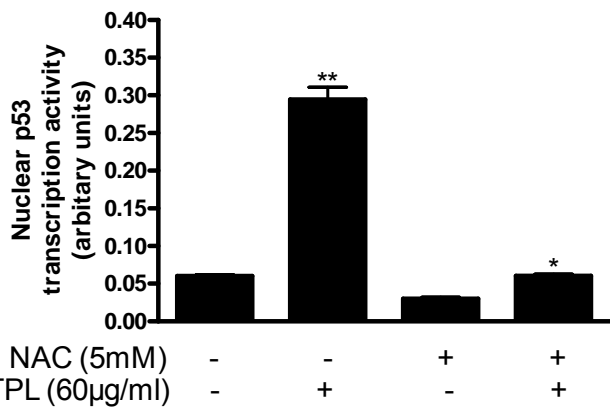

D

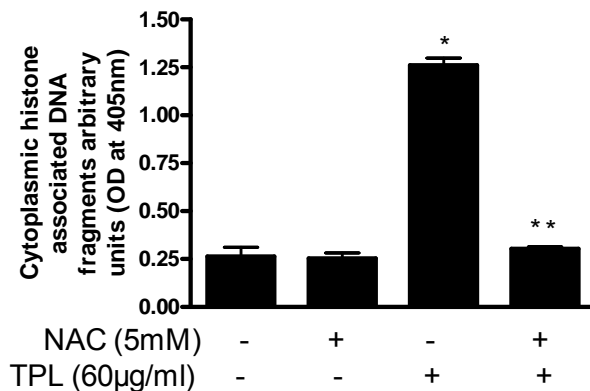

Supplement: MOESM4 [file 9471478]
